# Supplementary material for: What’s in a name? Protocol for a bibliometric and content analysis of rehabilitation, reablement, reactivation, and restorative health care services
Source: bioRxiv or medRxiv preprint supplement (doi:10.1101/2024.07.09.24309987), 2024-07-10
Supplement: Supplementary file [file media-1.pdf]

## S1 Appendix Preliminary Search Strategy

The following search strategy will be employed:

1. "crippl\*" [Title/Abstract]
2. "disab\*" [Title/Abstract]
3. "handicap\*" [Title/Abstract]
4. "disabled persons" [MeSH Terms] OR "disabled persons" [Text Word]
5. "physical challenge" [Title/Abstract:~2]
6. "physical\* challenge\*" [Title/Abstract]
7. "physically challenged" [Title/Abstract]
8. "maim" [Title/Abstract] OR "maimed" [Title/Abstract] OR "maimed" [Title/Abstract] OR "maiming" [Title/Abstract]
9. "paralyze\*" [Text Word] OR "paralysis" [Text Word]
10. "Paraplegia" [MeSH Terms] OR "Paraplegia" [Text Word] OR "paraplegic" [Text Word]
11. "quadriplegi\*" [Text Word]
12. "traumatic brain injury" [Text Word] OR "brain injuries, traumatic" [MeSH Terms]
13. "acquired brain injury" [Text Word]
14. "physical therapy modalities" [MeSH Terms] OR "physical therapy modalities" [Text Word]
15. "physiotherap\*" [Text Word]
16. "physical therapy modalities" [MeSH Terms] OR "physical therapy" [Text Word]
17. "physical therapists" [MeSH Terms] OR "physical therapist" [Text Word]
18. "occupational therapy" [MeSH Terms] OR "occupational therapy" [Text Word]
19. "ergotherap\*" [Text Word]
20. "occupational therap\*" [Text Word]
21. "speech and language pathologist" [Text Word]
22. "speech" [Text Word] AND "language patholog\*" [Text Word]
23. "speech language patholog\*" [Text Word]
24. "SLP" [Text Word]
25. "speech therapy" [MeSH Terms] OR "speech therapy" [Text Word]
26. "speech therapist" [Text Word]
27. "recreation therapy" [MeSH Terms] OR "recreation therapy" [Text Word]
28. "recreation therapist" [Text Word]
29. "therapeutic recreation" [Text Word]
30. "intermediate care facilities" [MeSH Terms] OR "intermediate care facilities" [Text Word]
31. "intermediate care" [Title/Abstract:~2]
32. "transitional care" [MeSH Terms] OR "transitional care" [Text Word] OR "transitional care" [Title/Abstract:~2]
33. "integrated care" [Title/Abstract:~2] OR "integrated care" [Text Word]
34. "Veterans" [MeSH Terms] OR "Veterans" [Text Word]
35. "re-ablement" [All Fields] AND "centre" [Text Word]
36. "reablement" [All Fields] AND "centre" [Text Word]
37. ("re-ablement" [All Fields] AND "centre" [Text Word]) OR ("reablement" [All Fields] AND "centre" [Text Word])
38. "reablement" [All Fields] AND "hospital" [Text Word]

39. "reablement"[All Fields] AND "medicine"[Text Word]
40. ("mouth"[MeSH Terms] OR "mouth"[All Fields] OR "mouths"[All Fields] OR "mouth s"[All Fields] OR "mouthed"[All Fields] OR "mouthful"[All Fields] OR "mouthfuls"[All Fields] OR "mouthing"[All Fields]) AND "reablement"[Text Word]
41. ("occupations"[MeSH Terms] OR "occupations"[All Fields] OR "vocation"[All Fields] OR "vocations"[All Fields] OR "vocational"[All Fields]) AND "reablement"[Text Word]
42. ("cardiacs"[All Fields] OR "heart"[MeSH Terms] OR "heart"[All Fields] OR "cardiac"[All Fields]) AND "reablement"[Text Word]
43. ("neurologic"[All Fields] OR "neurological"[All Fields] OR "neurologically"[All Fields]) AND "reablement"[All Fields]
44. ("psychiatric"[All Fields] OR "psychiatrically"[All Fields] OR "psychiatrics"[All Fields] OR "psychiatry"[MeSH Terms] OR "psychiatry"[All Fields] OR "psychiatric"[All Fields]) AND "reablement"[Text Word]
45. "reablement"[All Fields] AND "nursing"[Text Word]
46. (((("physical therapy modalities"[MeSH Terms] OR "physical therapy modalities"[Text Word] OR "physiotherap\*"[Text Word] OR ("physical therapy modalities"[MeSH Terms] OR "physical therapy"[Text Word]) OR ("physical therapists"[MeSH Terms] OR "physical therapist"[Text Word]) OR ("occupational therapy"[MeSH Terms] OR "occupational therapy"[Text Word]) OR "ergotherap\*"[Text Word] OR "occupational therap\*"[Text Word] OR "speech and language pathologist"[Text Word] OR ("Speech"[Text Word] AND "language patholog\*"[Text Word]) OR ("speech therapy"[MeSH Terms] OR "speech therapy"[Text Word]) OR "speech therapist"[Text Word]) AND "Or"[All Fields]) AND ("recreation therapy"[MeSH Terms] OR "recreation therapy"[Text Word])) OR "recreation therapist"[Text Word] OR "therapeutic recreation"[Text Word] OR (("mouth"[MeSH Terms] OR "mouth"[All Fields] OR "mouths"[All Fields] OR "mouth s"[All Fields] OR "mouthed"[All Fields] OR "mouthful"[All Fields] OR "mouthfuls"[All Fields] OR "mouthing"[All Fields]) AND "reablement"[Text Word]) OR (("occupations"[MeSH Terms] OR "occupations"[All Fields] OR "vocation"[All Fields] OR "vocations"[All Fields] OR "vocational"[All Fields]) AND "reablement"[Text Word]) OR (("cardiacs"[All Fields] OR "heart"[MeSH Terms] OR "heart"[All Fields] OR "cardiac"[All Fields]) AND "reablement"[Text Word]) OR (("neurologic"[All Fields] OR "neurological"[All Fields] OR "neurologically"[All Fields]) AND "reablement"[All Fields]) OR (("psychiatric"[All Fields] OR "psychiatrically"[All Fields] OR "psychiatrics"[All Fields] OR "psychiatry"[MeSH Terms] OR "psychiatry"[All Fields] OR "psychiatric"[All Fields]) AND "reablement"[Text Word]) OR ("reablement"[All Fields] AND "nursing"[Text Word])
47. (((("physical therapy modalities"[MeSH Terms] OR "physical therapy modalities"[Text Word] OR "physiotherap\*"[Text Word] OR ("physical therapy modalities"[MeSH Terms] OR "physical therapy"[Text Word]) OR ("physical therapists"[MeSH Terms] OR "physical therapist"[Text Word]) OR ("occupational therapy"[MeSH Terms] OR "occupational therapy"[Text Word]) OR "ergotherap\*"[Text Word] OR "occupational therap\*"[Text Word] OR "speech and language pathologist"[Text Word] OR ("Speech"[Text Word] AND "language patholog\*"[Text Word]) OR "speech language patholog\*"[Text Word] OR "SLP"[Text Word] OR ("speech therapy"[MeSH Terms] OR "speech therapy"[Text Word]) OR "speech therapist"[Text Word]) AND "Or"[All Fields]) AND ("recreation therapy"[MeSH Terms] OR "recreation therapy"[Text Word])) OR

- "recreation therapist"[Text Word] OR "therapeutic recreation"[Text Word] OR  
 (("mouth"[MeSH Terms] OR "mouth"[All Fields] OR "mouths"[All Fields] OR "mouth  
 s"[All Fields] OR "mouthed"[All Fields] OR "mouthful"[All Fields] OR "mouthfuls"[All  
 Fields] OR "mouthing"[All Fields]) AND "reablement"[Text Word]) OR  
 (("occupations"[MeSH Terms] OR "occupations"[All Fields] OR "vocation"[All Fields]  
 OR "vocations"[All Fields] OR "vocational"[All Fields]) AND "reablement"[Text Word])  
 OR (("cardiacs"[All Fields] OR "heart"[MeSH Terms] OR "heart"[All Fields] OR  
 "cardiac"[All Fields]) AND "reablement"[Text Word]) OR (("neurologic"[All Fields] OR  
 "neurological"[All Fields] OR "neurologically"[All Fields]) AND "reablement"[All  
 Fields]) OR (("psychiatric"[All Fields] OR "psychiatrically"[All Fields] OR  
 "psychiatrics"[All Fields] OR "psychiatry"[MeSH Terms] OR "psychiatry"[All Fields]  
 OR "psychiatric"[All Fields]) AND "reablement"[Text Word]) OR ("reablement"[All  
 Fields] AND "nursing"[Text Word])
48. ("reablement"[All Fields] AND "medicine"[Text Word]) OR (("mouth"[MeSH Terms]  
 OR "mouth"[All Fields] OR "mouths"[All Fields] OR "mouth s"[All Fields] OR  
 "mouthed"[All Fields] OR "mouthful"[All Fields] OR "mouthfuls"[All Fields] OR  
 "mouthing"[All Fields]) AND "reablement"[Text Word]) OR (("occupations"[MeSH  
 Terms] OR "occupations"[All Fields] OR "vocation"[All Fields] OR "vocations"[All  
 Fields] OR "vocational"[All Fields]) AND "reablement"[Text Word]) OR (("cardiacs"[All  
 Fields] OR "heart"[MeSH Terms] OR "heart"[All Fields] OR "cardiac"[All Fields]) AND  
 "reablement"[Text Word]) OR (("neurologic"[All Fields] OR "neurological"[All Fields]  
 OR "neurologically"[All Fields]) AND "reablement"[All Fields]) OR (("neurologic"[All  
 Fields] OR "neurological"[All Fields] OR "neurologically"[All Fields]) AND  
 "reablement"[All Fields]) OR (("psychiatric"[All Fields] OR "psychiatrically"[All  
 Fields] OR "psychiatrics"[All Fields] OR "psychiatry"[MeSH Terms] OR  
 "psychiatry"[All Fields] OR "psychiatric"[All Fields]) AND "reablement"[Text Word])  
 OR ("reablement"[All Fields] AND "nursing"[Text Word]) OR (("stroke"[MeSH Terms]  
 OR "stroke"[All Fields] OR "strokes"[All Fields] OR "stroke s"[All Fields]) AND  
 "reablement"[Text Word])
49. "amputation"[Text Word] OR "amputation, surgical"[MeSH Terms] OR  
 "Veterans"[MeSH Terms] OR "Veterans"[Text Word]
50. "amputation"[Text Word] OR "amputation, surgical"[MeSH Terms]
51. ("re-ablement"[All Fields] AND "centre"[Text Word]) OR ("reablement"[All Fields]  
 AND "centre"[Text Word]) OR ("reablement"[All Fields] AND "hospital"[Text Word])  
 OR ("integrated care"[Title/Abstract:~2] OR "integrated care"[Text Word]) OR  
 ("transitional care"[MeSH Terms] OR "transitional care"[Text Word] OR "transitional  
 care"[Title/Abstract:~2]) OR ("intermediate care facilities"[MeSH Terms] OR  
 "intermediate care facilities"[Text Word]) OR "reablement care"[Text Word]
52. (("re-ablement"[All Fields] AND "centre"[Text Word]) OR ("reablement"[All Fields]  
 AND "centre"[Text Word]) OR ("reablement"[All Fields] AND "hospital"[Text Word])  
 OR ("integrated care"[Title/Abstract:~2] OR "integrated care"[Text Word]) OR  
 ("transitional care"[MeSH Terms] OR "transitional care"[Text Word] OR "transitional  
 care"[Title/Abstract:~2]) OR ("intermediate care facilities"[MeSH Terms] OR  
 "intermediate care facilities"[Text Word]) OR "reablement care"[Text Word]) AND  
 ("amputation"[Text Word] OR "amputation, surgical"[MeSH Terms] OR  
 ("Veterans"[MeSH Terms] OR "Veterans"[Text Word]) OR ("crippl\*" [Title/Abstract] OR

"disab\*" [Title/Abstract] OR "handicap\*" [Title/Abstract] OR ("disabled persons" [MeSH Terms] OR "disabled persons" [Text Word]) OR "physical challenge" [Title/Abstract:~2] OR "physical\* challenge\*" [Title/Abstract] OR "physically challenged" [Title/Abstract] OR ("maim" [Title/Abstract] OR "maimed" [Title/Abstract] OR "maimed" [Title/Abstract] OR "maiming" [Title/Abstract]) OR ("paralyze\*" [Text Word] OR "paralysis" [Text Word]) OR ("Paraplegia" [MeSH Terms] OR "Paraplegia" [Text Word] OR "paraplegic" [Text Word]) OR "quadriplegi\*" [Text Word] OR ("traumatic brain injury" [Text Word] OR "brain injuries, traumatic" [MeSH Terms]) OR "acquired brain injury" [Text Word]) AND ((("reablement" [All Fields] AND "medicine" [Text Word]) OR ("mouth" [MeSH Terms] OR "mouth" [All Fields] OR "mouths" [All Fields] OR "mouth s" [All Fields] OR "mouthed" [All Fields] OR "mouthful" [All Fields] OR "mouthfuls" [All Fields] OR "mouthing" [All Fields]) AND "reablement" [Text Word]) OR ((("occupations" [MeSH Terms] OR "occupations" [All Fields] OR "vocation" [All Fields] OR "vocations" [All Fields] OR "vocational" [All Fields]) AND "reablement" [Text Word]) OR ((("cardiacs" [All Fields] OR "heart" [MeSH Terms] OR "heart" [All Fields] OR "cardiac" [All Fields]) AND "reablement" [Text Word]) OR ((("neurologic" [All Fields] OR "neurological" [All Fields] OR "neurologically" [All Fields]) AND "reablement" [All Fields]) OR ((("neurologic" [All Fields] OR "neurological" [All Fields] OR "neurologically" [All Fields]) AND "reablement" [All Fields]) OR ((("psychiatric" [All Fields] OR "psychiatrically" [All Fields] OR "psychiatrics" [All Fields] OR "psychiatry" [MeSH Terms] OR "psychiatry" [All Fields] OR "psychiatric" [All Fields]) AND "reablement" [Text Word]) OR ("reablement" [All Fields] AND "nursing" [Text Word]) OR ((("stroke" [MeSH Terms] OR "stroke" [All Fields] OR "strokes" [All Fields] OR "stroke s" [All Fields]) AND "reablement" [Text Word]) OR (((("physical therapy modalities" [MeSH Terms] OR "physical therapy modalities" [Text Word] OR "physiotherap\*" [Text Word] OR ("physical therapy modalities" [MeSH Terms] OR "physical therapy" [Text Word]) OR ("physical therapists" [MeSH Terms] OR "physical therapist" [Text Word]) OR ("occupational therapy" [MeSH Terms] OR "occupational therapy" [Text Word]) OR "ergotherap\*" [Text Word] OR "occupational therap\*" [Text Word] OR "speech and language pathologist" [Text Word] OR ("Speech" [Text Word] AND "language patholog\*" [Text Word]) OR "speech language patholog\*" [Text Word] OR "SLP" [Text Word] OR ("speech therapy" [MeSH Terms] OR "speech therapy" [Text Word]) OR "speech therapist" [Text Word]) AND "Or" [All Fields]) AND ("recreation therapy" [MeSH Terms] OR "recreation therapy" [Text Word])) OR "recreation therapist" [Text Word] OR "therapeutic recreation" [Text Word]))

53. "amputation" [Text Word] OR "amputation, surgical" [MeSH Terms] OR "Veterans" [MeSH Terms] OR "Veterans" [Text Word] OR "crippl\*" [Title/Abstract] OR "disab\*" [Title/Abstract] OR "handicap\*" [Title/Abstract] OR "disabled persons" [MeSH Terms] OR "disabled persons" [Text Word] OR "physical challenge" [Title/Abstract:~2] OR "physical\* challenge\*" [Title/Abstract] OR "physically challenged" [Title/Abstract] OR "maim" [Title/Abstract] OR "maimed" [Title/Abstract] OR "maimed" [Title/Abstract] OR "maiming" [Title/Abstract] OR "paralyze\*" [Text Word] OR "paralysis" [Text Word] OR "Paraplegia" [MeSH Terms] OR "Paraplegia" [Text Word] OR "paraplegic" [Text Word] OR "quadriplegi\*" [Text Word] OR "traumatic brain injury" [Text Word] OR "brain injuries, traumatic" [MeSH Terms] OR "acquired brain injury" [Text Word]

54. ("reablement"[All Fields] AND "medicine"[Text Word]) OR (("mouth"[MeSH Terms] OR "mouth"[All Fields] OR "mouths"[All Fields] OR "mouth s"[All Fields] OR "mouthed"[All Fields] OR "mouthful"[All Fields] OR "mouthfuls"[All Fields] OR "mouthing"[All Fields]) AND "reablement"[Text Word]) OR (("occupation"[MeSH Terms] OR "occupation"[All Fields] OR "vocation"[All Fields] OR "vocations"[All Fields] OR "vocational"[All Fields]) AND "reablement"[Text Word]) OR (("cardiacs"[All Fields] OR "heart"[MeSH Terms] OR "heart"[All Fields] OR "cardiac"[All Fields]) AND "reablement"[Text Word]) OR (("neurologic"[All Fields] OR "neurological"[All Fields] OR "neurologically"[All Fields]) AND "reablement"[All Fields]) OR (("neurologic"[All Fields] OR "neurological"[All Fields] OR "neurologically"[All Fields]) AND "reablement"[All Fields]) OR (("psychiatric"[All Fields] OR "psychiatrically"[All Fields] OR "psychiatrics"[All Fields] OR "psychiatry"[MeSH Terms] OR "psychiatry"[All Fields] OR "psychiatric"[All Fields]) AND "reablement"[Text Word]) OR ("reablement"[All Fields] AND "nursing"[Text Word]) OR (("stroke"[MeSH Terms] OR "stroke"[All Fields] OR "strokes"[All Fields] OR "stroke s"[All Fields]) AND "reablement"[Text Word]) OR (((("physical therapy modalities"[MeSH Terms] OR "physical therapy modalities"[Text Word] OR "physiotherap\*"[Text Word] OR ("physical therapy modalities"[MeSH Terms] OR "physical therapy"[Text Word]) OR ("physical therapists"[MeSH Terms] OR "physical therapist"[Text Word]) OR ("occupational therapy"[MeSH Terms] OR "occupational therapy"[Text Word]) OR "ergotherap\*"[Text Word] OR "occupational therap\*"[Text Word] OR "speech and language pathologist"[Text Word] OR ("Speech"[Text Word] AND "language patholog\*"[Text Word]) OR "speech language patholog\*"[Text Word] OR "SLP"[Text Word] OR ("speech therapy"[MeSH Terms] OR "speech therapy"[Text Word]) OR "speech therapist"[Text Word]) AND "Or"[All Fields]) AND ("recreation therapy"[MeSH Terms] OR "recreation therapy"[Text Word])) OR "recreation therapist"[Text Word] OR "therapeutic recreation"[Text Word])
55. (((("physical therapy modalities"[MeSH Terms] OR "physical therapy modalities"[Text Word] OR "physiotherap\*"[Text Word] OR ("physical therapy modalities"[MeSH Terms] OR "physical therapy"[Text Word]) OR ("physical therapists"[MeSH Terms] OR "physical therapist"[Text Word]) OR ("occupational therapy"[MeSH Terms] OR "occupational therapy"[Text Word]) OR "ergotherap\*"[Text Word] OR "occupational therap\*"[Text Word] OR "speech and language pathologist"[Text Word] OR ("Speech"[Text Word] AND "language patholog\*"[Text Word]) OR "speech language patholog\*"[Text Word] OR "SLP"[Text Word] OR ("speech therapy"[MeSH Terms] OR "speech therapy"[Text Word]) OR "speech therapist"[Text Word]) AND "Or"[All Fields]) AND ("recreation therapy"[MeSH Terms] OR "recreation therapy"[Text Word])) OR "recreation therapist"[Text Word] OR "therapeutic recreation"[Text Word])
56. "crippl\*"[Title/Abstract] OR "disab\*"[Title/Abstract] OR "handicap\*"[Title/Abstract] OR "disabled persons"[MeSH Terms] OR "disabled persons"[Text Word] OR "physical challenge"[Title/Abstract:~2] OR "physical\* challenge\*"[Title/Abstract] OR "physically challenged"[Title/Abstract] OR "maim"[Title/Abstract] OR "maimed"[Title/Abstract] OR "maimed"[Title/Abstract] OR "maiming"[Title/Abstract] OR "paralyze\*"[Text Word] OR "paralysis"[Text Word] OR "Paraplegia"[MeSH Terms] OR "Paraplegia"[Text Word] OR "paraplegic"[Text Word] OR "quadriplegi\*"[Text Word] OR "traumatic brain injury"[Text

Word] OR "brain injuries, traumatic"[MeSH Terms] OR "acquired brain injury"[Text Word]

57. ("amputation"[Text Word] OR "amputation, surgical"[MeSH Terms] OR ("Veterans"[MeSH Terms] OR "Veterans"[Text Word]) OR ("crippl\*" [Title/Abstract] OR "disab\*" [Title/Abstract] OR "handicap\*" [Title/Abstract] OR ("disabled persons"[MeSH Terms] OR "disabled persons"[Text Word]) OR "physical challenge"[Title/Abstract:~2] OR "physical\* challenge\*" [Title/Abstract] OR "physically challenged"[Title/Abstract] OR ("maim" [Title/Abstract] OR "maimed" [Title/Abstract] OR "maimed" [Title/Abstract] OR "maiming" [Title/Abstract]) OR ("paralyze\*" [Text Word] OR "paralysis" [Text Word]) OR ("Paraplegia"[MeSH Terms] OR "Paraplegia"[Text Word] OR "paraplegic" [Text Word]) OR "quadriplegi\*" [Text Word] OR ("traumatic brain injury" [Text Word] OR "brain injuries, traumatic" [MeSH Terms]) OR "acquired brain injury" [Text Word])) AND ((("re-ablement" [All Fields] AND "centre" [Text Word]) OR ("reablement" [All Fields] AND "centre" [Text Word]) OR ("reablement" [All Fields] AND "hospital" [Text Word]) OR ("integrated care" [Title/Abstract:~2] OR "integrated care" [Text Word]) OR ("transitional care" [MeSH Terms] OR "transitional care" [Text Word] OR "transitional care" [Title/Abstract:~2]) OR ("intermediate care facilities" [MeSH Terms] OR "intermediate care facilities" [Text Word]) OR "reablement care" [Text Word])
58. ("amputation"[Text Word] OR "amputation, surgical"[MeSH Terms] OR ("Veterans"[MeSH Terms] OR "Veterans"[Text Word]) OR ("crippl\*" [Title/Abstract] OR "disab\*" [Title/Abstract] OR "handicap\*" [Title/Abstract] OR ("disabled persons"[MeSH Terms] OR "disabled persons"[Text Word]) OR "physical challenge"[Title/Abstract:~2] OR "physical\* challenge\*" [Title/Abstract] OR "physically challenged"[Title/Abstract] OR ("maim" [Title/Abstract] OR "maimed" [Title/Abstract] OR "maimed" [Title/Abstract] OR "maiming" [Title/Abstract]) OR ("paralyze\*" [Text Word] OR "paralysis" [Text Word]) OR ("Paraplegia"[MeSH Terms] OR "Paraplegia"[Text Word] OR "paraplegic" [Text Word]) OR "quadriplegi\*" [Text Word] OR ("traumatic brain injury" [Text Word] OR "brain injuries, traumatic" [MeSH Terms]) OR "acquired brain injury" [Text Word])) AND ((("reablement" [All Fields] AND "medicine" [Text Word]) OR ("mouth" [MeSH Terms] OR "mouth" [All Fields] OR "mouths" [All Fields] OR "mouth s" [All Fields] OR "mouthed" [All Fields] OR "mouthful" [All Fields] OR "mouthfuls" [All Fields] OR "mouthing" [All Fields]) AND "reablement" [Text Word]) OR ((("occupations" [MeSH Terms] OR "occupations" [All Fields] OR "vocation" [All Fields] OR "vocations" [All Fields] OR "vocational" [All Fields]) AND "reablement" [Text Word]) OR ((("cardiacs" [All Fields] OR "heart" [MeSH Terms] OR "heart" [All Fields] OR "cardiac" [All Fields]) AND "reablement" [Text Word]) OR ((("neurologic" [All Fields] OR "neurological" [All Fields] OR "neurologically" [All Fields]) AND "reablement" [All Fields]) OR ((("neurologic" [All Fields] OR "neurological" [All Fields] OR "neurologically" [All Fields]) AND "reablement" [All Fields]) OR ((("psychiatric" [All Fields] OR "psychiatrically" [All Fields] OR "psychiatrics" [All Fields] OR "psychiatry" [MeSH Terms] OR "psychiatry" [All Fields] OR "psychiatric" [All Fields]) AND "reablement" [Text Word]) OR ("reablement" [All Fields] AND "nursing" [Text Word]) OR ((("stroke" [MeSH Terms] OR "stroke" [All Fields] OR "strokes" [All Fields] OR "stroke s" [All Fields]) AND "reablement" [Text Word]))
59. ("amputation"[Text Word] OR "amputation, surgical"[MeSH Terms] OR ("Veterans"[MeSH Terms] OR "Veterans"[Text Word]) OR ("crippl\*" [Title/Abstract] OR

"disab\*"[Title/Abstract] OR "handicap\*"[Title/Abstract] OR ("disabled persons"[MeSH Terms] OR "disabled persons"[Text Word]) OR "physical challenge"[Title/Abstract:~2] OR "physical\* challenge\*"[Title/Abstract] OR "physically challenged"[Title/Abstract] OR ("maim"[Title/Abstract] OR "maimed"[Title/Abstract] OR "maimed"[Title/Abstract] OR "maiming"[Title/Abstract]) OR ("paralyze\*"[Text Word] OR "paralysis"[Text Word]) OR ("Paraplegia"[MeSH Terms] OR "Paraplegia"[Text Word] OR "paraplegic"[Text Word]) OR "quadriplegi\*"[Text Word] OR ("traumatic brain injury"[Text Word] OR "brain injuries, traumatic"[MeSH Terms]) OR "acquired brain injury"[Text Word])) AND "reablement"[All Fields]

60. "reablement"[Text Word]
